# Supplementary material for: Computational aptamer design for spike glycoprotein (S) (SARS CoV-2) detection with an electrochemical aptasensor
Source: Springer Nature journal article supplement (doi:10.1007/s00253-024-13066-w), 2024-03-12
Supplement: 253_2024_13066_MOESM1_ESM.pdf [file 253_2024_13066_MOESM1_ESM.pdf]

**SUPPLEMENTARY INFORMATION AMBB-D-23-00029R2**

**Manuscript:**

**Computational aptamer design for spike glycoprotein (S) (SARS CoV-2) detection with an electrochemical aptasensor**

**Journal: Applied Microbiology and Biotechnology**

**Authors:**

**Alessia Cossettini<sup>1</sup>, Laura Pasquardini<sup>2</sup>, Antonello Romani<sup>3</sup>, Aldo Feriani<sup>3</sup>, Debora Pinamonti<sup>1</sup>, Marisa Manzano<sup>1\*</sup>**

<sup>1</sup>Department of Agriculture Food Environmental and Animal Sciences, University of Udine, Italy

<sup>2</sup>Indivenire srl, via alla Cascata 56/C, 38123 Trento, Italy

<sup>3</sup>Arta Peptidion srls, via Quasimodo 11, 43126 Parma, Italy

**Corresponding author:**

Marisa Manzano; marisa.manzano@uniud.it; Dipartimento di Scienze AgroAlimentari, Ambientali e Animali, via Sondrio 2/A, 33100 Udine, Italia

phone: +390432558127

fax: +390432558130

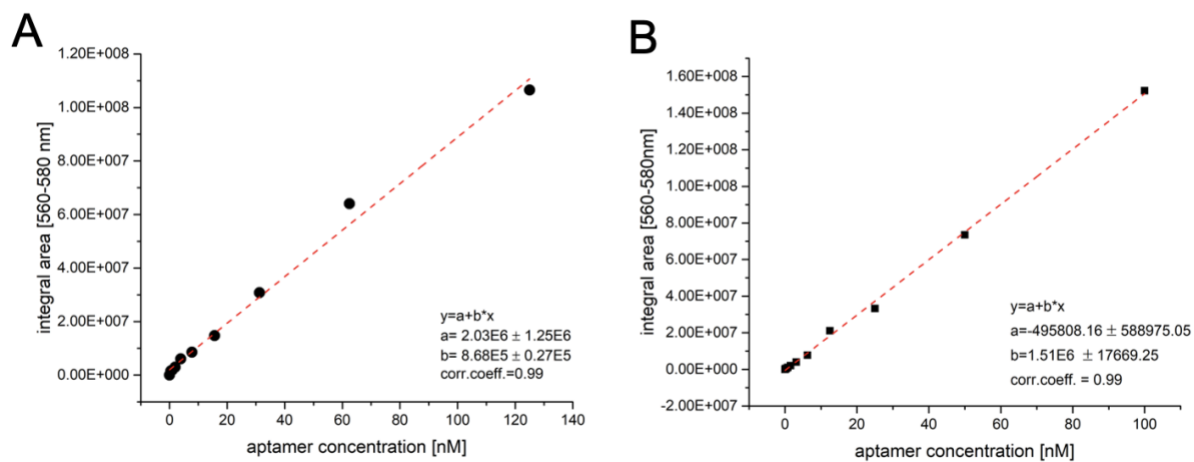

**Fig. S1** Calibration curve of aptamer-TAMRA in PBS buffer (A) or TRIS buffer (B). Linear regression on short concentration range is reported in red dashed lines.

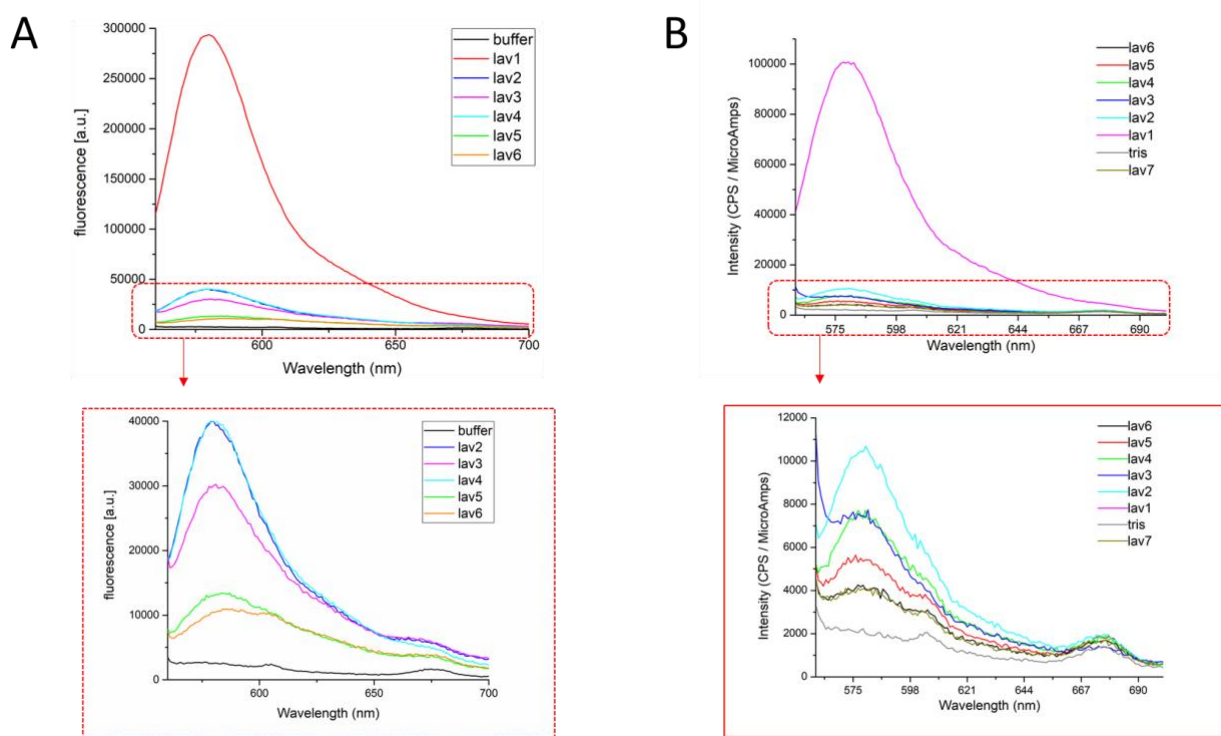

**Figure S2:** Spectrofluorimetric analysis on washing steps performed in PBS buffer (A) or TRIS buffer (B). A plot magnification is reported below, highlighting washing 2 up to 6 or 7.

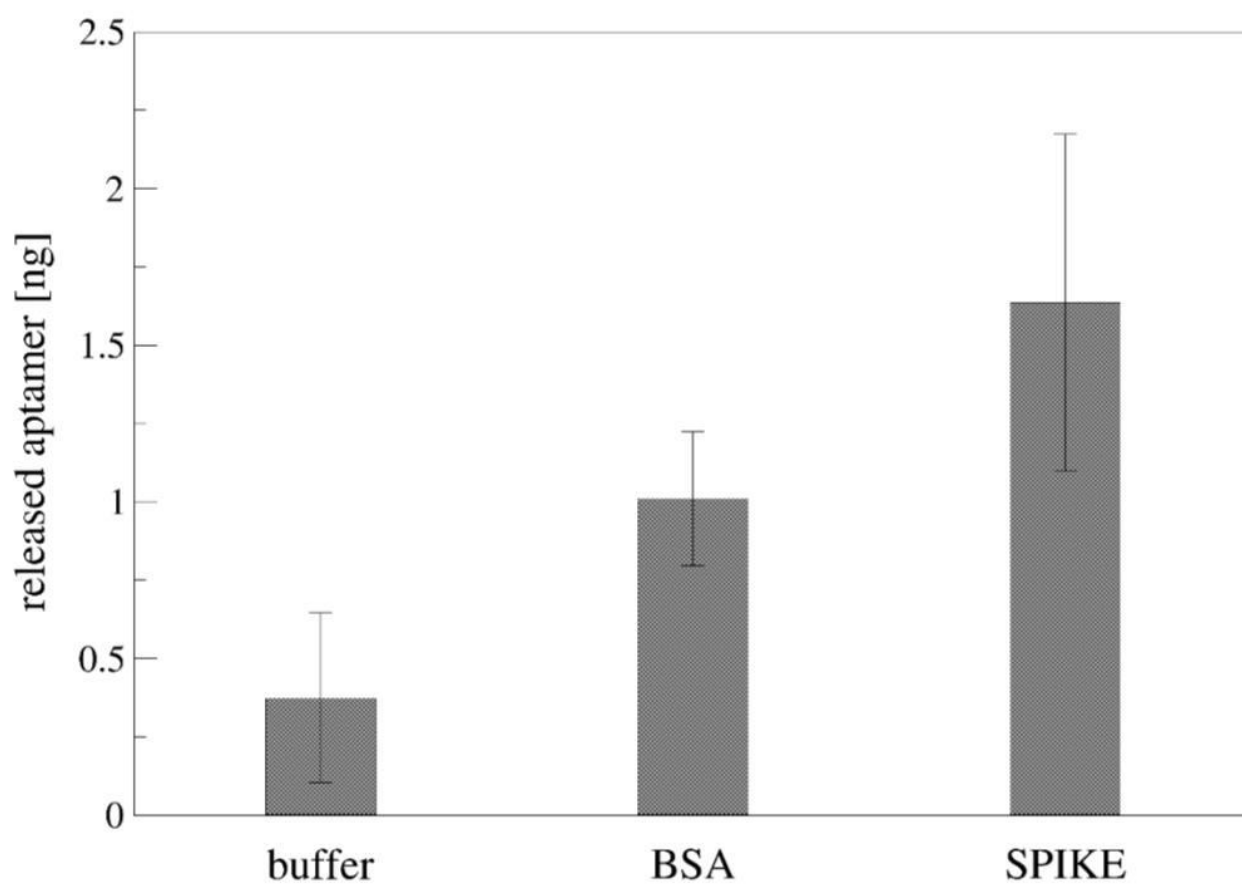

**Fig. S3 fluorescent aptamer quantification after released from electrode caused by protein interaction. Bars represent the mean value of two independent experiments and error bars represent the standard deviation.**
